# Supplementary material
Source: publisher figshare collection journal article supplement (https://rs.figshare.com/ndownloader/files/14050466)
Supplement: Supplementary file 1 [file 14050466]

## Sheet: Tabelle1
Table S13. List of used taxon names with their definitions and synonyms including the newly proposed names. Most established taxonomic names come from Beccaloni and Eggleton (2013) or from the Cockroach Species File online database (Beccaloni, 2018) whose taxonomy is largely based off of (Roth, 2003). “=” columns represent synonymous clade names. Names marked with a "*" are newly proposed here. N…
Taxon name		Rank of favored name		=		=		=		=		=
Solumblattodea*		Sub-order		Corydioidea + Blattoidea
Corydioidea		Super-family		Corydiinae + Polyphaginae + Latindiinae + Nocticolinae + Tiviinae + Euthyrraphinae + Holocompsinae		Corydiidae sensu lato		Corydiidae + Nocticolidae		Corydiidae sensu stricto + Latindiinae + Nocticolidae/ Nocticolinae		Polyphagoidea
Corydiidae sensu stricto		Family		Holocompsinae + Tiviinae + Euthyrrhaphinae + Corydiinae
Nocticolinae		Sub-family		Nocticolidae
Blattoidea		Super-family		Blattidae + Tryonicidae + Lamproblattidae + Cryptocercidae + Isoptera
Anaplectidae		Family		Anaplecta		Anaplectinae
Blattoidae		Epi-family		Blattidae + Tryonicidae
Blattinae sensu lato		Sub-family		Blattinae + Archiblattinae		Blattinae + Catara
Tryonicus		Genus		Tryonicidae		Tryonicinae
Lamproblatta		Genus		Lamproblattinae		Lamproblattidae
Kittrickea*		Unranked		Lamproblattidae + Cryptocercidae + Isoptera
Turtricablattae*		Unranked		Cryptocercidae + Isoptera
Isoptera		Unranked		Termitoidae
Euisoptera		Unranked		Isoptera excluding Mastotermitidae/Mastotermes
Neoisoptera		Unranked		Prorhinotermes + Reticulitermes + Coptotermes
Blaberoidea		Super-family		Ectobiinae + Pseudophyllodromiinae + Blattellinae + Nyctiborinae + Blaberidae
Ectobius		Genus		Ectobiinae
Diploptera		Genus		Diplopterinae
Oxyhaloinae		Sub-family		Princisia + Nauphoeta
